# Supplementary material for: Transmission risk beyond the village: entomological and human factors contributing to residual malaria transmission in an area approaching malaria elimination on the Thailand–Myanmar border
Source: PubMed Central journal article supplement (PMC6604376; doi:10.1186/s12936-019-2852-5), 2019-07-01
Supplement: 12936_2019_2852_MOESM1_ESM.pdf [file 12936_2019_2852_MOESM1_ESM.pdf]

**Table S1. Demographics of the surveyed adult (aged 18 years and over) population in the three study****villages of Tha Song Yang district**

|                     | Komonae<br>(n = 115) |       |             | Suan Oi<br>(n = 265) |       |             | Pha Man<br>(n = 50) |     |             | Total<br>(n = 430) |       |             |
|---------------------|----------------------|-------|-------------|----------------------|-------|-------------|---------------------|-----|-------------|--------------------|-------|-------------|
|                     | n                    | %     | 95% CI      | n                    | %     | 95% CI      | n                   | %   | 95% CI      | n                  | %     | 95% CI      |
| <b>Sex</b>          |                      |       |             |                      |       |             |                     |     |             |                    |       |             |
| Male                | 51                   | 44.35 | 35.49-53.58 | 113                  | 42.64 | 36.79-48.70 | 22                  | 44  | 30.86-58.04 | 186                | 43.26 | 38.63-48.00 |
| Female              | 64                   | 55.65 | 46.42-64.51 | 152                  | 57.36 | 51.30-63.21 | 28                  | 56  | 41.96-69.14 | 244                | 56.74 | 52.00-61.37 |
| <b>Nationality</b>  |                      |       |             |                      |       |             |                     |     |             |                    |       |             |
| Thai                | 22                   | 19.13 | 12.90-27.42 | 80                   | 30.42 | 25.14-36.27 | 12                  | 24  | 14.06-37.87 | 114                | 26.64 | 22.65-31.04 |
| MM                  | 93                   | 80.87 | 72.58-87.10 | 183                  | 69.58 | 63.73-74.86 | 38                  | 76  | 62.13-85.94 | 314                | 73.36 | 68.96-77.35 |
| <b>Ethnic group</b> |                      |       |             |                      |       |             |                     |     |             |                    |       |             |
| Thai                | 3                    | 2.61  | 0.84-7.84   | 17                   | 6.42  | 4.02-10.10  | 1                   | 2   | 0.27-13.17  | 21                 | 4.88  | 3.20-7.39   |
| Karen               | 112                  | 97.39 | 92.16-99.16 | 248                  | 93.58 | 89.90-95.98 | 49                  | 98  | 86.83-99.73 | 409                | 95.12 | 92.61-96.80 |
| <b>Residency</b>    |                      |       |             |                      |       |             |                     |     |             |                    |       |             |
| Permanent           | 114                  | 100   |             | 259                  | 98.48 | 96.00-99.43 | 50                  | 100 |             | 423                | 99.06 | 97.52-99.65 |
| Temp. >6m           | 0                    |       |             | 3                    | 1.14  | 0.37-3.49   | 0                   |     |             | 3                  | 0.7   | 0.23-2.16   |
| Temp <6m            | 0                    |       |             | 1                    | 0.38  | 0.05-2.67   | 0                   |     |             | 1                  | 0.23  | 0.03-1.66   |
| <b>Occupation</b>   |                      |       |             |                      |       |             |                     |     |             |                    |       |             |
| Farmer              | 62                   | 53.91 | 44.71-62.86 | 51                   | 19.25 | 14.92-24.47 | 22                  | 44  | 30.86-58.04 | 135                | 31.4  | 27.17-35.96 |
| Labourer            | 23                   | 20    | 13.63-28.37 | 106                  | 40    | 34.25-46.04 | 13                  | 26  | 15.63-39.99 | 142                | 33.02 | 28.72-37.63 |
| Sales               | 2                    | 1.74  | 0.43-6.75   | 26                   | 9.81  | 6.75-14.04  | 2                   | 4   | 0.98-14.87  | 30                 | 6.98  | 4.91-9.82   |
| Forestry            | 0                    |       |             | 1                    | 0.38  | 0.05-2.65   | 1                   | 2   | 0.27-13.17  | 2                  | 0.47  | 0.12-1.85   |
| Cattle trader       | 0                    |       |             | 2                    | 0.75  | 0.19-2.98   | 0                   |     |             | 2                  | 0.47  | 0.12-1.85   |
| Unemployed          | 2                    | 1.74  | 0.43-6.75   | 18                   | 6.79  | 4.31-10.54  | 4                   | 8   | 3.00-19.67  | 24                 | 5.58  | 3.76-8.20   |
| Other               | 4                    | 4.3   | 1.61-10.99  | 17                   | 7.87  | 4.93-12.33  | 0                   |     |             | 21                 | 5.98  | 3.92-9.02   |
| Housewife           | 22                   | 19.13 | 12.90-27.42 | 49                   | 18.49 | 14.25-23.65 | 8                   | 16  | 8.14-29.06  | 79                 | 18.37 | 14.98-22.33 |
