# Supplementary material for: Transmission risk beyond the village: entomological and human factors contributing to residual malaria transmission in an area approaching malaria elimination on the Thailand–Myanmar border
Source: PubMed Central journal article supplement (PMC6604376; doi:10.1186/s12936-019-2852-5), 2019-07-01
Supplement: 12936_2019_2852_MOESM2_ESM.pdf [file 12936_2019_2852_MOESM2_ESM.pdf]

**Table S2. Utilisation of bed nets the previous night by demographic factor among the surveyed adult****population**

|                     |         | Didn't sleep under net |      |          | Slept under conventional net |      |           | Slept under ITN/LLIN |      |           |
|---------------------|---------|------------------------|------|----------|------------------------------|------|-----------|----------------------|------|-----------|
|                     |         | n                      | %    | 95% CI   | n                            | %    | 95% CI    | n                    | %    | 95% CI    |
| <b>Total</b>        |         | 28                     | 6.5  | 4.5-9.3  | 60                           | 14.0 | 11.0-17.6 | 342                  | 79.5 | 75.4-83.1 |
| <b>Village</b>      | Komonae | 13                     | 11.3 | 6.7-18.6 | 3                            | 2.6  | 0.8-7.8   | 99                   | 86.1 | 78.4-91.3 |
|                     | Suan Oi | 14                     | 5.3  | 3.2-8.7  | 48                           | 18.1 | 13.9-23.2 | 203                  | 2.0  | 71.1-81.3 |
|                     | Pha Man | 1                      | 2.0  | 0.3-13.2 | 9                            | 18.0 | 9.6-31.3  | 40                   | 80.0 | 66.5-89.0 |
| <b>Sex</b>          | Male    | 18                     | 9.7  | 6.2-14.9 | 23                           | 12.4 | 8.3-18.0  | 145                  | 78.0 | 71.4-83.4 |
|                     | Female  | 10                     | 4.1  | 2.2-7.5  | 37                           | 15.2 | 11.2-20.3 | 197                  | 80.7 | 75.3-85.2 |
| <b>Nationality</b>  | Thai    | 8                      | 7.0  | 3.5-13.5 | 31                           | 27.2 | 19.8-36.1 | 75                   | 65.8 | 56.6-74.0 |
|                     | MM      | 20                     | 6.4  | 4.1-9.7  | 29                           | 9.2  | 6.5-13.0  | 265                  | 84.4 | 79.9-88.0 |
| <b>Ethnic group</b> | Thai    | 1                      | 4.8  | 0.6-28.3 | 3                            | 14.3 | 4.5-36.9  | 17                   | 81.0 | 58.1-92.9 |
|                     | Karen   | 27                     | 6.6  | 4.6-9.5  | 57                           | 13.9 | 10.9-17.7 | 325                  | 79.5 | 75.3-83.1 |
