# Supplementary material for: Transmission risk beyond the village: entomological and human factors contributing to residual malaria transmission in an area approaching malaria elimination on the Thailand–Myanmar border
Source: PubMed Central journal article supplement (PMC6604376; doi:10.1186/s12936-019-2852-5), 2019-07-01
Supplement: 12936_2019_2852_MOESM3_ESM.pdf [file 12936_2019_2852_MOESM3_ESM.pdf]

**Table S3. Calculation of indoor and outdoor exposure risk for users and non-users of LLINs in Pha**

**Man.**

\* PERSONAL PROTECTION PROVIDED BY AN LLIN (Mean of Okumu et al 2011 Malaria Journal 10: 208) = 0.937

*An. maculatus s.l.:*

| Hours                  | IHLC biting rate (b <sub>pn</sub> ) | OHLC biting rate (b <sub>pn</sub> ) | Proportion of the population indoors | Indoor exposure without use of ITN | Indoor exposure with use of ITN* | Outdoor exposure | Indoor exposure prevented by ITN |
|------------------------|-------------------------------------|-------------------------------------|--------------------------------------|------------------------------------|----------------------------------|------------------|----------------------------------|
| 6pm-7pm                | 0.08                                | 0.42                                | 0.66                                 | 0.06                               | 0.00                             | 0.14             | 0.05                             |
| 7pm-8pm                | 0.33                                | 0.92                                | 0.74                                 | 0.25                               | 0.02                             | 0.24             | 0.23                             |
| 8pm-9pm                | 0.33                                | 0.25                                | 0.88                                 | 0.29                               | 0.02                             | 0.03             | 0.27                             |
| 9pm-10pm               | 0.42                                | 0.00                                | 0.94                                 | 0.39                               | 0.02                             | 0.00             | 0.37                             |
| 10pm-11pm              | 0.17                                | 0.33                                | 0.86                                 | 0.14                               | 0.01                             | 0.05             | 0.13                             |
| 11pm-12pm              | 0.08                                | 0.00                                | 1.00                                 | 0.08                               | 0.01                             | 0.00             | 0.08                             |
| 12pm-1am               | 0.00                                | 0.08                                | 1.00                                 | 0.00                               | 0.00                             | 0.00             | 0.00                             |
| 1am-2am                | 0.08                                | 0.00                                | 1.00                                 | 0.08                               | 0.01                             | 0.00             | 0.08                             |
| 2am-3am                | 0.00                                | 0.08                                | 1.00                                 | 0.00                               | 0.00                             | 0.00             | 0.00                             |
| 3am-4am                | 0.00                                | 0.00                                | 1.00                                 | 0.00                               | 0.00                             | 0.00             | 0.00                             |
| 4am-5am                | 0.00                                | 0.08                                | 1.00                                 | 0.00                               | 0.00                             | 0.00             | 0.00                             |
| 5am-6am                | 0.17                                | 0.42                                | 0.97                                 | 0.16                               | 0.01                             | 0.01             | 0.15                             |
| <b>ALL NIGHT TOTAL</b> |                                     |                                     |                                      | <b>1.46</b>                        | <b>0.09</b>                      | <b>0.47</b>      | <b>1.37</b>                      |

Proportion of human exposure occurring indoors for non-users of LLINs ( $\pi_i$ ): 0.76

Proportion of human exposure occurring indoors for users of LLINs ( $\pi_{i,n}$ ): 0.16

*An. minimus s.l.:*

| Hours           | IHLC<br>biting<br>rate (bpn) | OHLC<br>biting<br>rate (bpn) | Proportion<br>of the<br>population<br>indoors | Indoor<br>exposure<br>without use<br>of ITN | Indoor<br>exposure<br>with use of<br>ITN* | Outdoor<br>exposure | Indoor<br>exposure<br>prevented<br>by ITN |
|-----------------|------------------------------|------------------------------|-----------------------------------------------|---------------------------------------------|-------------------------------------------|---------------------|-------------------------------------------|
| 6pm-7pm         | 0.00                         | 0.08                         | 0.66                                          | 0.00                                        | 0.00                                      | 0.03                | 0.00                                      |
| 7pm-8pm         | 0.17                         | 0.17                         | 0.74                                          | 0.12                                        | 0.01                                      | 0.04                | 0.12                                      |
| 8pm-9pm         | 0.17                         | 0.25                         | 0.88                                          | 0.15                                        | 0.01                                      | 0.03                | 0.14                                      |
| 9pm-10pm        | 0.42                         | 0.58                         | 0.94                                          | 0.39                                        | 0.02                                      | 0.04                | 0.37                                      |
| 10pm-11pm       | 1.25                         | 1.17                         | 0.86                                          | 1.08                                        | 0.07                                      | 0.16                | 1.01                                      |
| 11pm-12pm       | 0.42                         | 0.25                         | 1.00                                          | 0.42                                        | 0.03                                      | 0.00                | 0.39                                      |
| 12pm-1am        | 0.25                         | 0.42                         | 1.00                                          | 0.25                                        | 0.02                                      | 0.00                | 0.23                                      |
| 1am-2am         | 1.17                         | 0.42                         | 1.00                                          | 1.17                                        | 0.07                                      | 0.00                | 1.09                                      |
| 2am-3am         | 0.58                         | 0.08                         | 1.00                                          | 0.58                                        | 0.04                                      | 0.00                | 0.55                                      |
| 3am-4am         | 0.42                         | 0.08                         | 1.00                                          | 0.42                                        | 0.03                                      | 0.00                | 0.39                                      |
| 4am-5am         | 0.33                         | 0.17                         | 1.00                                          | 0.33                                        | 0.02                                      | 0.00                | 0.31                                      |
| 5am-6am         | 0.50                         | 0.58                         | 0.97                                          | 0.49                                        | 0.03                                      | 0.02                | 0.45                                      |
| ALL NIGHT TOTAL |                              |                              |                                               | <b>5.39</b>                                 | <b>0.34</b>                               | <b>0.32</b>         | <b>5.05</b>                               |

Proportion of human exposure occurring indoors for non-users of LLINs ( $\pi_i$ ): 0.94

Proportion of human exposure occurring indoors for users of LLINs ( $\pi_{i,n}$ ): 0.52
